# Supplementary material
Source: MDPI journal article supplement (https://www.mdpi.com/2073-4441/15/5/947)
Supplement: s1 [file s1]

**Table S1.** Statistical parameters for each considered input variables scenario (according to Table 8) and for each tested optimizer for MLP, LSTM and convolutional models.

|         |                | Scenarios |       |       |       |       |       |        |        |        |        |        |        |
|---------|----------------|-----------|-------|-------|-------|-------|-------|--------|--------|--------|--------|--------|--------|
|         |                | TP1       | TP2   | TP3   | TP4   | TP5   | TP6   | TP&AT1 | TP&AT2 | TP&AT3 | TP&AT4 | TP&AT5 | TP&AT6 |
|         |                | MLP       |       |       |       |       |       |        |        |        |        |        |        |
| Adagrad | NSE            | -0.46     | 0.56  | 0.59  | 0.12  | 0.60  | 0.21  | -0.10  | 0.10   | 0.71   | -0.59  | -      | 0.19   |
|         | R <sup>2</sup> | 0.20      | 0.66  | 0.59  | 0.46  | 0.63  | 0.59  | 0.22   | 0.50   | 0.72   | 0.24   | -      | 0.46   |
|         | PBIAS          | -80.8     | 16.0  | -0.5  | 11.1  | 8.8   | 93.6  | -41.4  | 12.5   | 6.2    | -56.3  | -      | 12.2   |
|         | RMSE           | 13.9      | 7.5   | 7.2   | 10.8  | 7.5   | 10.1  | 12.0   | 10.9   | 6.1    | 14.4   | -      | 10.3   |
| Adam    | NSE            | -0.64     | 0.10  | 0.59  | 0.53  | 0.60  | 0.37  | -      | 0.16   | 0.72   | -0.06  | -      | -0.13  |
|         | R <sup>2</sup> | 0.19      | 0.51  | 0.61  | 0.54  | 0.83  | 0.62  | -      | 0.64   | 0.74   | 0.47   | -      | 0.50   |
|         | PBIAS          | -54.6     | -92.7 | -16.4 | 15.3  | -26.4 | 27.4  | -      | 37.6   | -19.3  | -58.7  | -      | -96.7  |
|         | RMSE           | 14.7      | 10.9  | 7.2   | 7.8   | 7.1   | 9.1   | -      | 10.5   | 6.0    | 11.8   | -      | 12.1   |
| Adamax  | NSE            | -0.23     | 0.41  | 0.69  | 0.49  | 0.80  | 0.40  | -0.20  | -0.34  | 0.69   | 0.06   | 0.74   | 0.06   |
|         | R <sup>2</sup> | 0.21      | 0.70  | 0.72  | 0.56  | 0.85  | 0.60  | 0.24   | 0.46   | 0.70   | 0.49   | 0.76   | 0.55   |
|         | PBIAS          | -36.5     | 36.0  | -54.9 | -18.0 | -17.3 | -32.7 | -33.4  | 42.5   | -8.0   | -49.9  | 21.3   | -69.8  |
|         | RMSE           | 12.7      | 8.8   | 6.2   | 8.2   | 5.0   | 8.8   | 12.5   | 13.3   | 6.2    | 11.1   | 5.8    | 11.1   |
| Nadam   | NSE            | -0.57     | -0.12 | 0.46  | 0.34  | 0.66  | 0.01  | -0.10  | 0.42   | 0.67   | 0.02   | 0.80   | 0.36   |
|         | R <sup>2</sup> | 0.20      | 0.61  | 0.71  | 0.53  | 0.81  | 0.60  | 0.24   | 0.61   | 0.68   | 0.47   | 0.85   | 0.49   |
|         | PBIAS          | -104.4    | -86.0 | 11.7  | -42.5 | -26.0 | -79.0 | -58.0  | -6.9   | 0.7    | -88.0  | -29.6  | 34.7   |
|         | RMSE           | 14.4      | 12.1  | 8.3   | 9.3   | 6.6   | 11.3  | 12.0   | 8.7    | 6.5    | 11.4   | 5.1    | 9.1    |
| RMSprop | NSE            | -0.08     | 0.56  | 0.68  | 0.30  | 0.68  | 0.04  | -0.08  | -0.36  | 0.66   | -1.36  | 0.65   | -0.51  |
|         | R <sup>2</sup> | 0.20      | 0.67  | 0.71  | 0.56  | 0.85  | 0.59  | 0.22   | 0.59   | 0.68   | 0.47   | 0.76   | 0.55   |
|         | PBIAS          | -26.5     | -19.9 | -17.6 | -62.8 | -39.2 | -58.6 | -51.7  | -67.0  | -24.2  | -101.2 | -50.4  | -95.5  |
|         | RMSE           | 11.9      | 7.6   | 6.4   | 9.6   | 6.4   | 11.2  | 11.9   | 13.3   | 6.6    | 17.7   | 6.7    | 14.0   |
| SGD     | NSE            | -0.49     | 0.31  | 0.63  | -     | 0.73  | 0.42  | -0.29  | 0.15   | -      | 0.17   | 0.66   | 0.10   |
|         | R <sup>2</sup> | 0.20      | 0.62  | 0.63  | -     | 0.75  | 0.60  | 0.24   | 0.46   | -      | 0.41   | 0.68   | 0.42   |
|         | PBIAS          | -58.0     | 51.0  | -8.9  | -     | -1.5  | 0.3   | -67.5  | 40.7   | -      | -39.4  | -5.6   | -12.1  |
|         | RMSE           | 14.0      | 9.5   | 6.9   | -     | 5.9   | 8.7   | 13.0   | 10.5   | -      | 10.5   | 6.6    | 10.8   |
|         |                | LSTM      |       |       |       |       |       |        |        |        |        |        |        |
| Adagrad | NSE            | 0.56      | 0.51  | -     | 0.50  | 0.48  | -0.03 | 0.01   | -      | 0.07   | -0.41  | 0.51   | -0.02  |
|         | R <sup>2</sup> | 0.58      | 0.69  | -     | 0.58  | 0.53  | 0.57  | 0.41   | -      | 0.18   | 0.50   | 0.60   | 0.57   |

|               |                |       |       |       |        |       |        |       |        |       |        |       |        |
|---------------|----------------|-------|-------|-------|--------|-------|--------|-------|--------|-------|--------|-------|--------|
|               | PBIAS          | -6.2  | -35.1 | -     | -23.9  | 13.1  | -39.0  | 17.8  | -      | 5.6   | -51.7  | 2.7   | -26.7  |
|               | RMSE           | 7.6   | 8.0   | 7.0   | 8.1    | 8.2   | 11.5   | 11.4  | -      | 10.9  | 13.6   | 7.9   | 11.5   |
| Adam          | NSE            | 0.15  | 0.24  | 0.62  | -      | 0.49  | 0.22   | 0.30  | -0.42  | 0.38  | -0.83  | 0.43  | 0.63   |
|               | R <sup>2</sup> | 0.56  | 0.69  | 0.63  | -      | 0.57  | 0.72   | 0.34  | 0.66   | 0.67  | 0.55   | 0.59  | 0.70   |
|               | PBIAS          | -47.3 | -58.5 | 17.2  | -      | 38.3  | -101.4 | 26.4  | 1.4    | 53.7  | -149.5 | 33.9  | 30.1   |
|               | RMSE           | 10.5  | 9.9   | -     | -      | 8.1   | 10.1   | 9.6   | 13.7   | 8.9   | 15.5   | 8.5   | 6.9    |
| Adamax        | NSE            | 0.25  | 0.46  | 0.59  | -      | 0.75  | -      | 0.54  | 0.51   | 0.51  | -0.66  | 0.42  | 0.47   |
|               | R <sup>2</sup> | 0.56  | 0.72  | 0.64  | -      | 0.83  | -      | 0.61  | 0.64   | 0.55  | 0.38   | 0.60  | 0.64   |
|               | PBIAS          | -43.9 | -38.5 | 11.7  | -      | 15.8  | -      | 38.4  | 9.4    | 15.5  | -10.3  | 46.2  | 14.2   |
|               | RMSE           | 9.9   | 8.4   | 7.3   | -      | 5.6   | -      | 7.8   | 8.0    | 7.9   | 14.8   | 8.6   | 8.3    |
| Nadam         | NSE            | 0.53  | 0.33  | 0.72  | 0.63   | 0.69  | 0.10   | 0.21  | 0.41   | 0.69  | -0.26  | 0.62  | -0.75  |
|               | R <sup>2</sup> | 0.62  | 0.61  | 0.72  | 0.67   | 0.75  | 0.70   | 0.56  | 0.64   | 0.75  | 0.52   | 0.75  | 0.61   |
|               | PBIAS          | -40.4 | -8.5  | -8.0  | -24.6  | -37.7 | -121.1 | -94.9 | -58.0  | -6.8  | -107.4 | 8.1   | -146.2 |
|               | RMSE           | 7.9   | 9.3   | 6.0   | 6.9    | 6.3   | 10.8   | 10.2  | 8.8    | 6.3   | 12.9   | 7.0   | 15.1   |
| RMSprop       | NSE            | 0.66  | 0.25  | 0.74  | 0.14   | 0.72  | -0.07  | 0.59  | -0.16  | 0.53  | -0.26  | 0.42  | -0.51  |
|               | R <sup>2</sup> | 0.66  | 0.59  | 0.76  | 0.66   | 0.72  | 0.54   | 0.61  | 0.57   | 0.64  | 0.63   | 0.72  | 0.68   |
|               | PBIAS          | 8.9   | 9.4   | 13.6  | -100.0 | -6.3  | -56.6  | -18.0 | -122.9 | -17.0 | -145.1 | 13.4  | -150.2 |
|               | RMSE           | 6.7   | 9.9   | 5.8   | 10.6   | 6.0   | 11.8   | 7.3   | 12.3   | 7.8   | 12.9   | 8.6   | 14.0   |
| SGD           | NSE            | 0.39  | -0.85 | 0.59  | -0.08  | 0.60  | 0.46   | 0.23  | -0.13  | -0.63 | -1.15  | -0.06 | -3.12  |
|               | R <sup>2</sup> | 0.56  | 0.69  | 0.61  | 0.04   | 0.68  | 0.69   | 0.43  | 0.38   | 0.47  | 0.44   | 0.23  | 0.36   |
|               | PBIAS          | -19.5 | -67.4 | -20.0 | -49.3  | 20.9  | -37.6  | 11.1  | -96.6  | 72.6  | -104.8 | -21.0 | 6.9    |
|               | RMSE           | 9.0   | 15.6  | 7.2   | 11.9   | 7.1   | 8.3    | 10.0  | 12.2   | 14.5  | 16.8   | 11.7  | 23.2   |
| Convolutional |                |       |       |       |        |       |        |       |        |       |        |       |        |
| Adagrad       | NSE            | -0.57 | -0.13 | 0.67  | -      | 0.83  | 0.39   | -0.24 | -0.12  | 0.60  | 0.48   | 0.66  | 0.18   |
|               | R <sup>2</sup> | 0.21  | 0.50  | 0.71  | -      | 0.84  | 0.53   | 0.23  | 0.60   | 0.65  | 0.53   | 0.75  | 0.44   |
|               | PBIAS          | -89.1 | 31.6  | -19.0 | -      | -4.4  | 4.5    | -21.9 | 5.5    | -21.4 | -2.7   | 21.6  | -26.9  |
|               | RMSE           | 14.4  | 12.2  | 6.4   | -      | 4.6   | 8.9    | 12.8  | 12.1   | 7.1   | 8.3    | 6.6   | 10.3   |
| Adam          | NSE            | -0.21 | 0.29  | 0.72  | 0.28   | 0.83  | -0.30  | -0.12 | -0.38  | 0.62  | 0.00   | 0.40  | 0.09   |
|               | R <sup>2</sup> | 0.21  | 0.57  | 0.72  | 0.58   | 0.85  | 0.67   | 0.22  | 0.63   | 0.68  | 0.65   | 0.72  | 0.66   |
|               | PBIAS          | -69.0 | -71.9 | 0.9   | 69.3   | -14.0 | -111.2 | -40.0 | -103.7 | 11.5  | -95.8  | -27.0 | -54.9  |
|               | RMSE           | 12.6  | 9.6   | 6.0   | 9.7    | 4.6   | 13.0   | 12.1  | 13.4   | 6.9   | 11.5   | 8.8   | 10.8   |
| Adamax        | NSE            | -0.19 | 0.28  | 0.76  | 0.39   | 0.71  | 0.20   | -0.14 | 0.29   | 0.60  | 0.12   | 0.46  | 0.24   |
|               | R <sup>2</sup> | 0.20  | 0.52  | 0.77  | 0.65   | 0.76  | 0.65   | 0.23  | 0.67   | 0.66  | 0.63   | 0.81  | 0.64   |

|         |                |        |       |       |       |       |       |        |       |       |        |       |        |
|---------|----------------|--------|-------|-------|-------|-------|-------|--------|-------|-------|--------|-------|--------|
|         | PBIAS          | -79.6  | -61.0 | -10.5 | -23.7 | -21.0 | -44.9 | -52.3  | -39.8 | 20.4  | -103.8 | -11.8 | -6.2   |
|         | RMSE           | 12.5   | 9.7   | 5.5   | 9.0   | 6.1   | 10.2  | 12.3   | 9.7   | 8.5   | 10.8   | 8.4   | 9.9    |
| Nadam   | NSE            | -0.23  | -0.10 | 0.62  | 0.13  | 0.86  | -0.13 | -0.35  | 0.19  | 0.67  | 0.02   | 0.56  | 0.01   |
|         | R <sup>2</sup> | 0.21   | 0.63  | 0.62  | 0.68  | 0.87  | 0.67  | 0.23   | 0.62  | 0.72  | 0.61   | 0.69  | 0.64   |
|         | PBIAS          | -18.3  | -8.7  | -6.7  | -91.7 | 10.5  | -90.2 | -46.6  | -20.7 | -3.0  | -32.0  | 31.1  | -1.6   |
|         | RMSE           | 12.7   | 12.0  | 6.9   | 10.7  | 4.2   | 12.1  | 13.3   | 10.3  | 7.2   | 11.3   | 7.4   | 11.3   |
|         |                |        |       |       |       |       |       |        |       |       |        |       |        |
| RMSprop | NSE            | -0.36  | -0.03 | 0.61  | 0.03  | 0.82  | 0.23  | -0.64  | 0.03  | 0.29  | 0.29   | 0.71  | -0.69  |
|         | R <sup>2</sup> | 0.21   | 0.59  | 0.74  | 0.66  | 0.83  | 0.65  | 0.24   | 0.73  | 0.66  | 0.58   | 0.74  | 0.60   |
|         | PBIAS          | -102.2 | -72.8 | -58.1 | -91.4 | -1.8  | -58.0 | -126.1 | 1.7   | -67.3 | -67.0  | -14.4 | -125.9 |
|         | RMSE           | 13.4   | 11.6  | 7.1   | 11.3  | 4.9   | 10.0  | 14.7   | 11.3  | 9.5   | 9.6    | 6.1   | 14.8   |
| SGD     | NSE            | -0.24  | 0.12  | 0.71  | -0.23 | 0.73  | 0.34  | -0.22  | 0.39  | 0.68  | 0.40   | 0.68  | 0.53   |
|         | R <sup>2</sup> | 0.21   | 0.47  | 0.73  | 0.33  | 0.86  | 0.59  | 0.23   | 0.55  | 0.69  | 0.50   | 0.71  | 0.66   |
|         | PBIAS          | -76.5  | -8.2  | -14.7 | -12.3 | -48.9 | -0.3  | -48.4  | 33.0  | -9.1  | -26.0  | -12.7 | -46.1  |
|         | RMSE           | 12.8   | 10.7  | 6.1   | 12.7  | 5.9   | 9.2   | 12.7   | 8.9   | 6.4   | 8.9    | 6.4   | 7.8    |
